# Supplementary material for: Parallel detection of multiple biomarkers in a point-of-care-competent device for the prediction of exacerbations in chronic inflammatory lung disease
Source: PubMed Central journal article supplement (PMC11150478; doi:10.1038/s41598-024-62784-8), 2024-06-04
Supplement: 41598_2024_62784_MOESM1_ESM.pdf [file 41598_2024_62784_MOESM1_ESM.pdf]

**Supporting Information:**

**Parallel detection of multiple biomarkers in a point-of care-competent device for the prediction of exacerbations in chronic inflammatory lung disease.**

Niels Röckendorf, Katrin Ramaker, Karoline Gaede, Kristof Tappertzhofen, Lars Lunding, Michael Wegmann, Peter Horbert, Karina Weber, Andreas Frey

Supporting Figure S1: Capture assay set-up for the detection of different analytes

A Coupling of capture antibody onto oxirane-modified glass surface

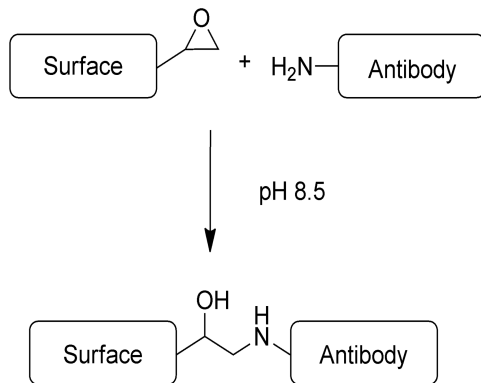

B Immobilization of analytes in different areas of glass slides via specific capture antibodies and detection by biotin-labeled antibodies and fluorophore-labeled streptavidin

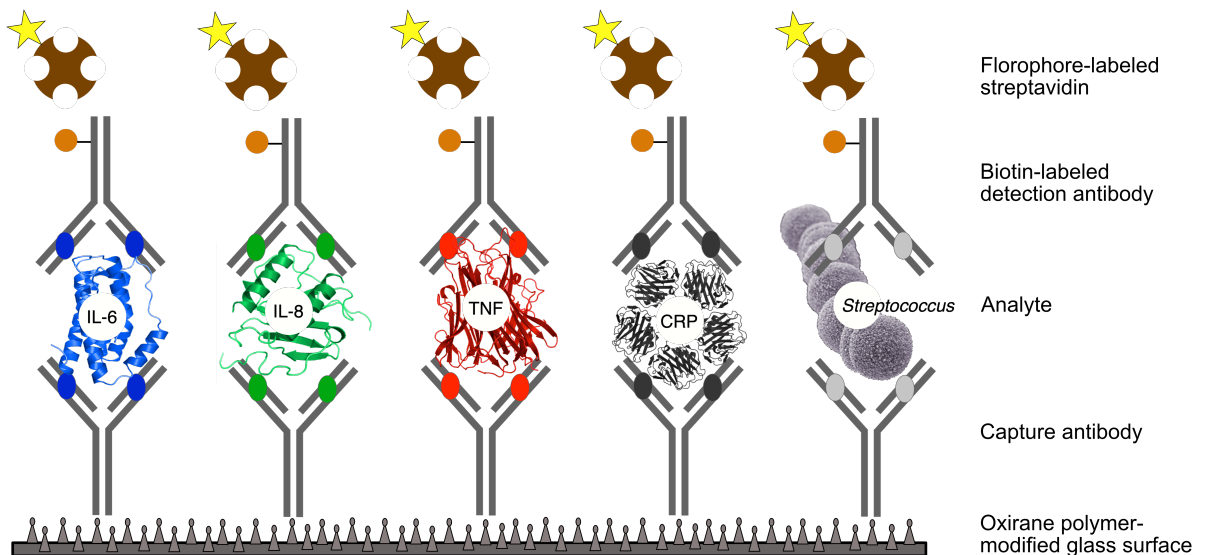

Supporting Table 1: Cytokine levels in saliva samples of asthma- and COPD patients as well as samples from healthy control subjects and control subjects with airway infections as measured by cytometric bead array (eCBA) test. Spiked Samples (each cytokine added in a nominal concentration of 1000 pg/ml) are marked by \*. Saliva samples analyzed in the fluidic device demonstrator (Figure 8 in main manuscript) are indicated by bold-faced numbers.

| Sample ID   | Group         | IL-6<br>[pg/ml] | IL-8<br>[pg/ml] | TNF- $\alpha$<br>[pg/ml] |
|-------------|---------------|-----------------|-----------------|--------------------------|
| 39*         | healthy       | 116.89          | 1666.65         | 267.89                   |
| 49          | healthy       | 18.77           | 1339.19         | 34.59                    |
| 59          | healthy       | 0.39            | 510.81          | 5.49                     |
| 61          | healthy       | 4.67            | 353.01          | 3.67                     |
| 62          | healthy       | 4.26            | 1625.87         | 16.24                    |
| 68          | healthy       | 3.93            | 1072.67         | 21.79                    |
| 77          | healthy       | 3.23            | 926.53          | 10.75                    |
| 78          | healthy       | 7.80            | 2759.22         | 11.12                    |
| 79          | healthy       | 1.40            | 399.00          | 0.00                     |
| 80          | healthy       | 12.72           | 2248.26         | 12.49                    |
| 124         | airway infect | 9.09            | 1636.91         | 12.34                    |
| 138         | airway infect | 3.42            | 1043.61         | 4.68                     |
| 139         | airway infect | 4.43            | 283.09          | 2.05                     |
| 158         | airway infect | 0.90            | 588.08          | 7.54                     |
| 160*        | airway infect | 153.90          | 1786.36         | 419.10                   |
| 161         | airway infect | 8.46            | 850.62          | 7.00                     |
| 162         | airway infect | 1.79            | 377.82          | 1.23                     |
| 166         | airway infect | 3.62            | 1715.70         | 10.90                    |
| 172         | airway infect | 1.96            | 202.04          | 1.87                     |
| 173         | airway infect | 1.98            | 374.93          | 1.90                     |
| 215         | asthma        | 10.37           | 456.16          | 0.18                     |
| <b>216</b>  | <b>asthma</b> | 21.75           | 1435.85         | 7.87                     |
| 217         | asthma        | 9.19            | 312.08          | 6.30                     |
| 218         | asthma        | 0.74            | 6685.65         | 21.67                    |
| 220         | asthma        | 8.10            | 1312.36         | 3.87                     |
| 222         | asthma        | 3.56            | 1916.28         | 6.94                     |
| 224         | asthma        | 0.53            | 861.78          | 0.00                     |
| 236*        | asthma        | 143.39          | 2204.84         | 253.09                   |
| 242         | asthma        | 4.20            | 2865.26         | 65.42                    |
| 246         | asthma        | 2.55            | 283.03          | 0.77                     |
| 307         | COPD          | 6.20            | 1168.00         | 11.61                    |
| 313         | COPD          | 20.84           | 1675.99         | 3.00                     |
| 314         | COPD          | 5.66            | 6827.54         | 32.36                    |
| 315         | COPD          | 4.67            | 103.67          | 1.24                     |
| <b>317</b>  | <b>COPD</b>   | 35.59           | 18737.29        | 43.20                    |
| 319         | COPD          | 4.44            | 1125.41         | 2.19                     |
| <b>337</b>  | <b>COPD</b>   | 31.82           | 19214.47        | 136.60                   |
| 338         | COPD          | 0.62            | 338.05          | 0.51                     |
| <b>339*</b> | <b>COPD</b>   | 228.17          | 47374.78        | 386.09                   |
| 340         | COPD          | 2.27            | 1799.51         | 10.72                    |
